# Supplementary material
Source: PubMed Central journal article supplement (PMC4682332)
Supplement: supp_tpc.15.00707_TPC2015-00707-RA_Supplemental_DataRev.pdf [file supp_tpc.15.00707_TPC2015-00707-RA_Supplemental_DataRev.pdf]

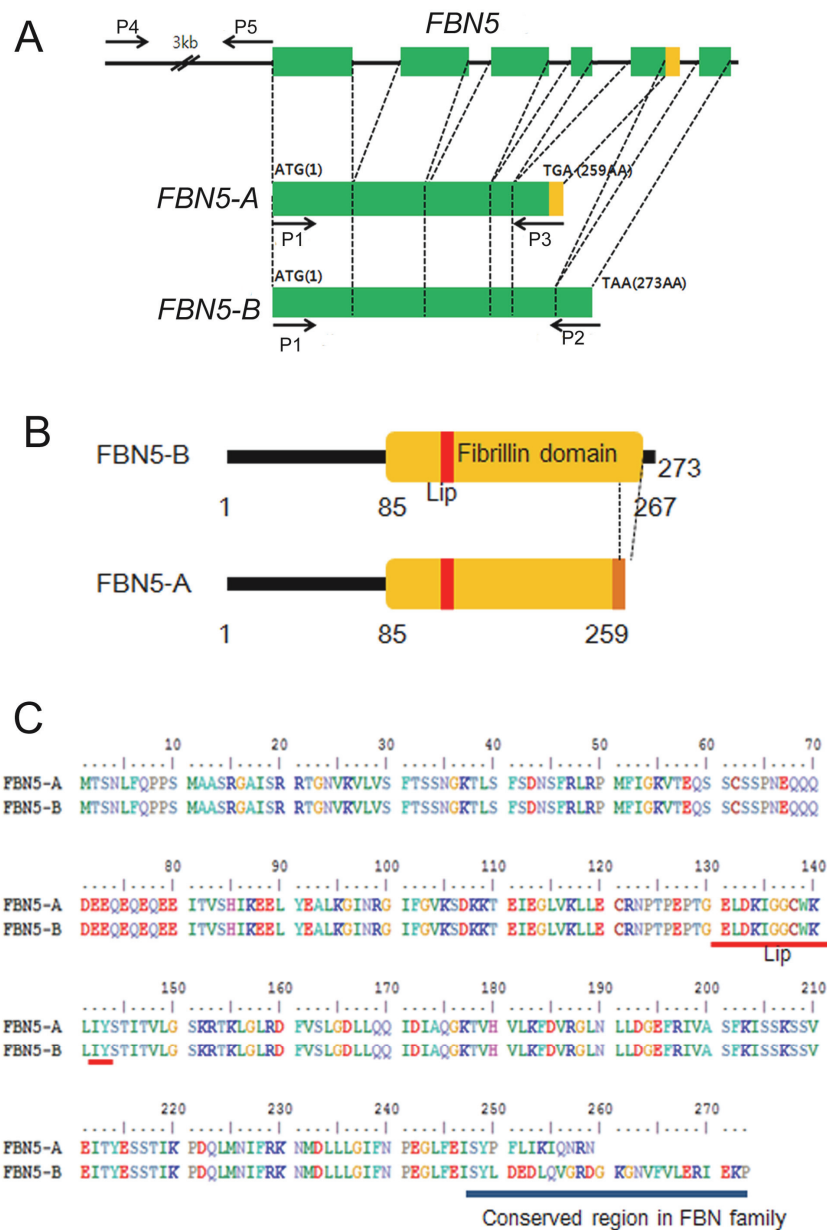

**Supplemental Figure 1.** Gene Structure of *FBN5*. (A) *FBN5* genomic structure and two alternatively spliced transcripts, *FBN5-A* and *FBN5-B*. (B) Two alternative-splicing products, *FBN5-A* and *FBN5-B*. A fibrillin domain was predicted at amino acids 8–267 by the Pfam database (<http://pfam.xfam.org/>). The numbers indicate the amino acid positions. Possible lipocalin motif 1 (Lip) sequences are shown red. (C) Sequence alignment of *FBN5-A* and *FBN5-B*. The N-terminal 249 residues are identical. *FBN5-A* is 14 amino acids shorter than *FBN5* and contains 10 unique residues at its carboxyl terminus. Predicted Lip motif 1 and the conserved domain near the fibrillin C-terminal residues are shown, according to Singh and McNellis (2011).

## REFERENCE

Singh, D.K. and McNellis, T.W. (2011). Fibrillin protein function: the tip of the iceberg? *Trends Plant Sci* 16: 432-441.

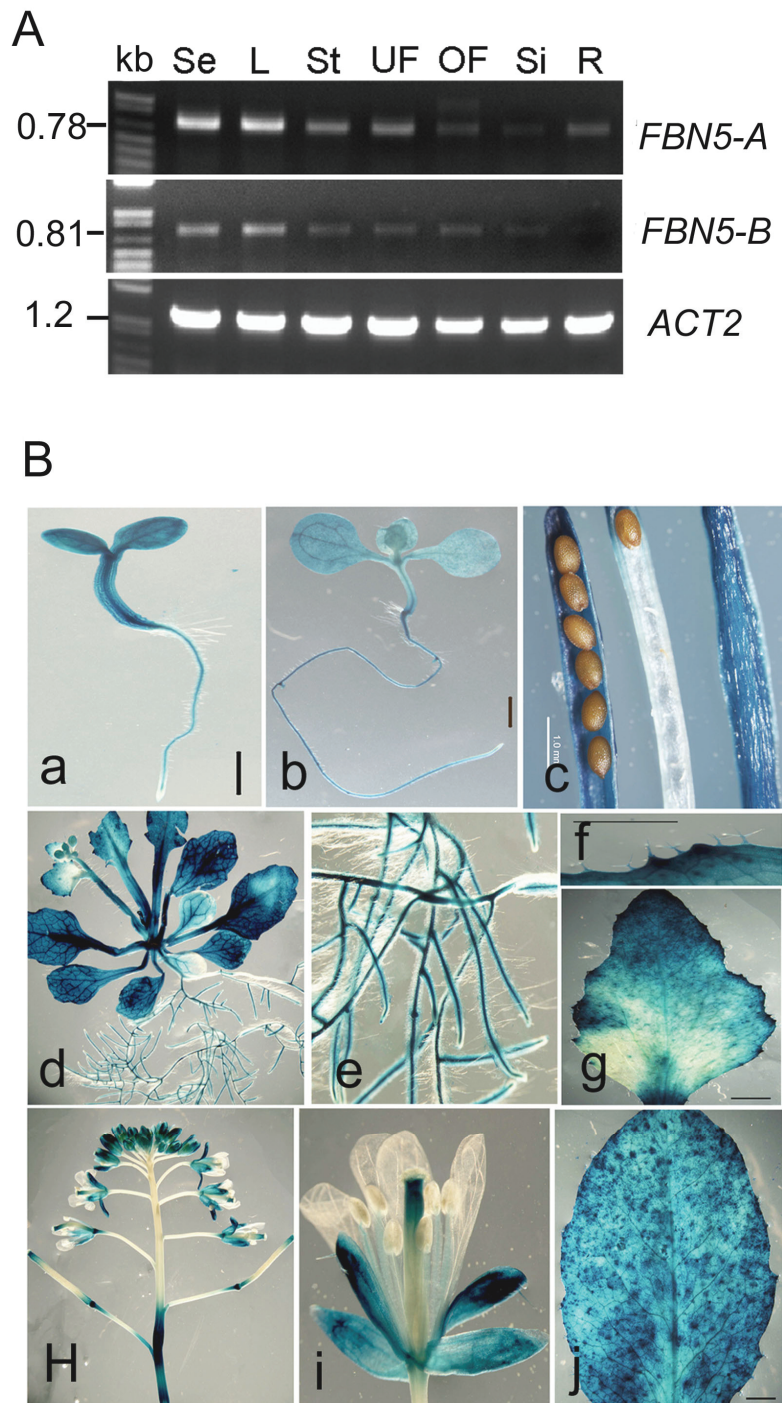

**Supplemental Figure 2.** Expression Patterns of *FBN5*. (A) RT-PCR analysis of *FBN5* transcripts in various tissues. Se, seedling; L, leaf; St, stem; UF, unopened flower; OF, open flower; Si, silique; and R, root. (B) *FBN5* promoter-GUS expression during the development of transgenic *Arabidopsis*. a, Two-day-old seedling; b, 6-day-old seedling; c, silique of 30-day-old plant; d, rosette of 18-day-old plant; e, root of 18-day-old plant; f, trichome; g, cauline leaf; h, flower cluster; i, flower after opening; and j, rosette leaf.

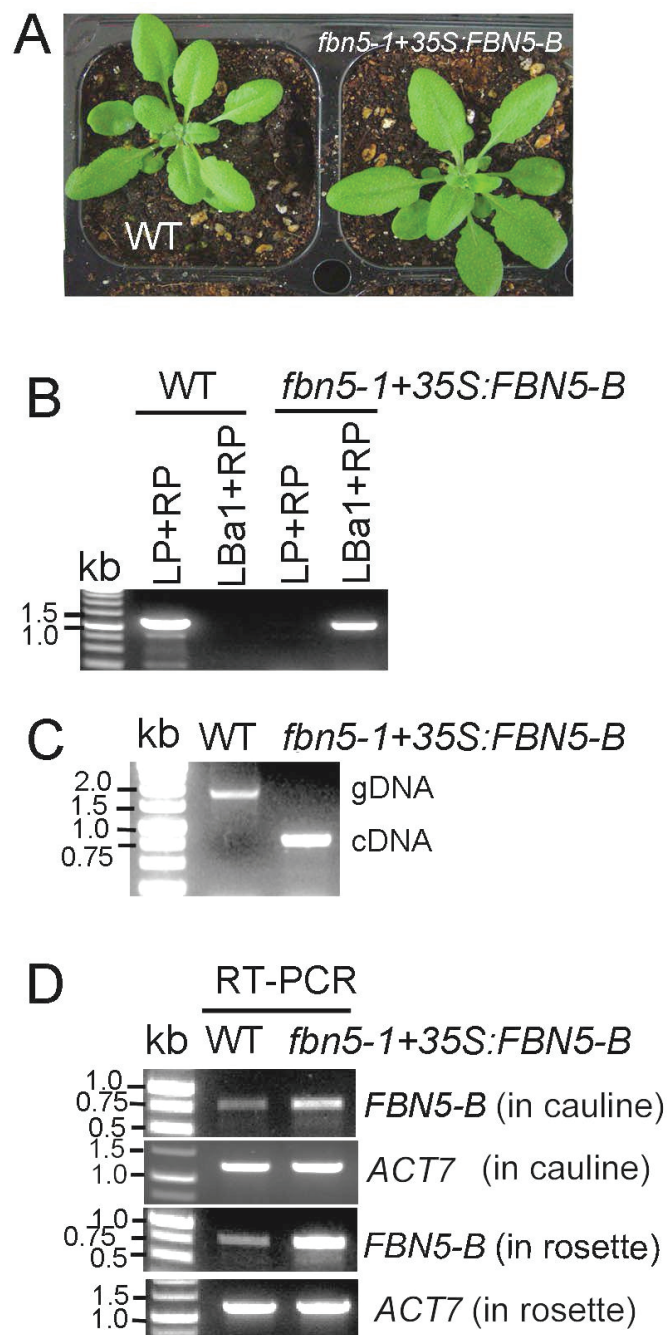

**Supplemental Figure 3.** Genetic Complementation of Seedling-Lethal Phenotype of the *fbn5-1* Plant with *FBN5-B* cDNA. (A) WT and *fbn5-1+35S-FBN5-B* *Arabidopsis* plants show similar phenotypes when grown in soil. (B) Genotyping WT and *fbn5-1+35S-FBN5-B* plants with PCR. A 1.2-kb PCR product was amplified from the WT plants but not the *fbn5-1+35S-FBN5-B* plants when the LP + RP primers were used. A 1.0-kb PCR product was detected in the *fbn5-1+35S:FBN5-B* plants but not in the WT when the LBa1 + RP primers were used. (C) 1.7-kb (1,669 bp) and 822-bp PCR products were amplified with P1 + P2 primers from the WT and *fbn5-1+35S:FBN5-B* plants, respectively. (D) Expression levels of full-length *FBN5-B* transcripts using the P1 + P2 primers and cDNA from cauline and rosette leaves of WT and *fbn5-1+35S:FBN5-B* plants. *ACT7*, internal control.

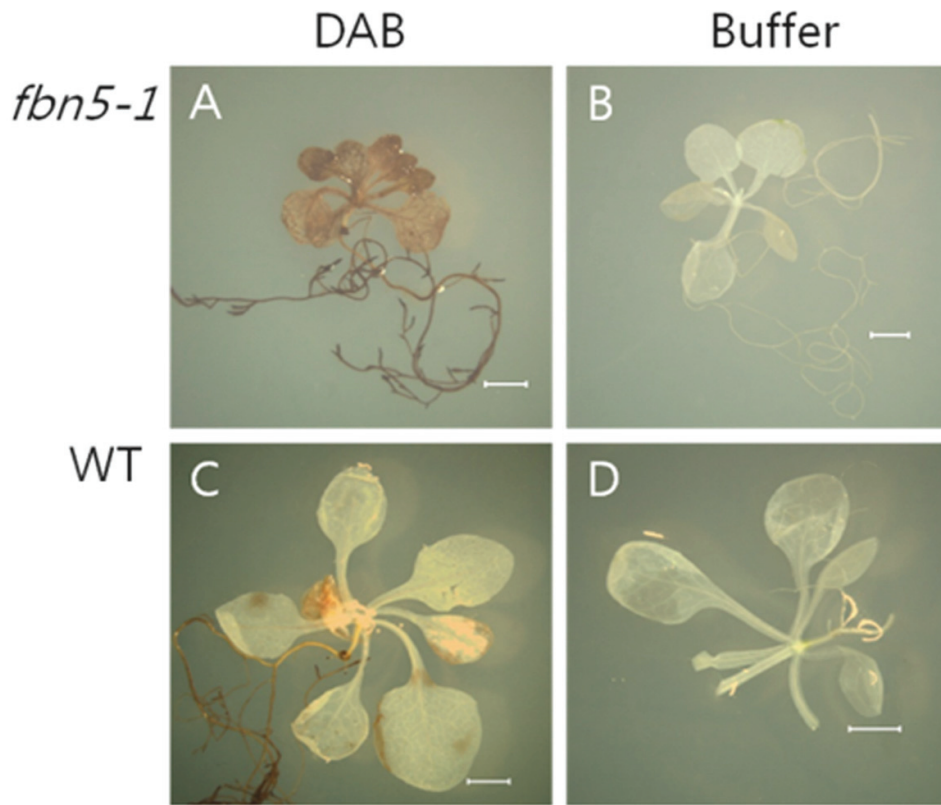

**Supplemental Figure 4.** H<sub>2</sub>O<sub>2</sub> Detection in *fbn5-1* and WT Plants by Staining with DAB (3,3'-diaminobenzidine). The plants were grown on MS medium supplemented with 1% sucrose for 3 weeks, and infiltrated with DAB solution (A, C) or with 10 mM NaH<sub>2</sub>PO<sub>4</sub> buffer (B, D) as a control. Bars = 2 mm.



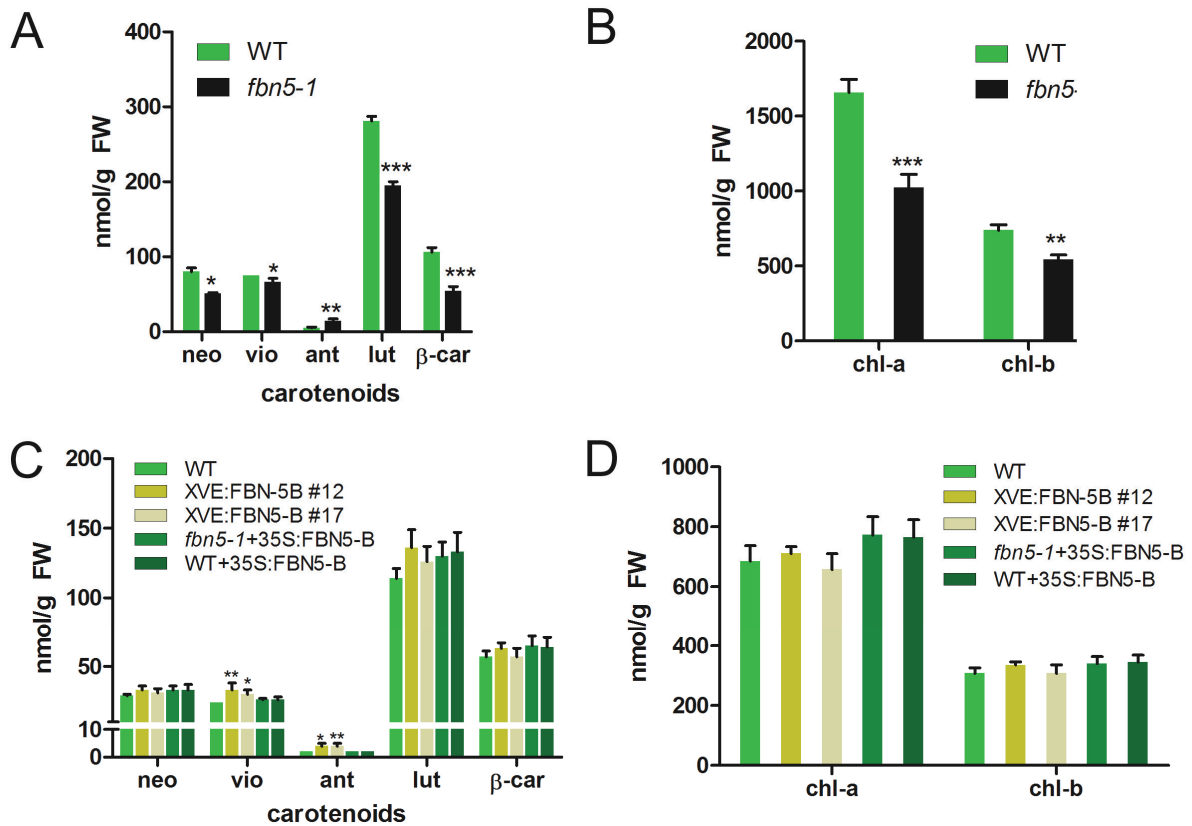

**Supplemental Figure 5.** Quantification of Carotenoids and Chlorophylls in *Arabidopsis* Leaves with Reversed-phase HPLC. Total lipids were extracted from the leaves of 3-week-old WT and *fbn5-1* homozygous mutant plants grown on MS medium (+1% sucrose) (A, B) and from 6-week-old WT and transgenic plants grown in soil (C, D), and quantified with HPLC. The quantities of individual carotenoids and chlorophylls were determined relative to standards. neo, neoxanthin; vio, violaxanthin; ant, antheraxanthin; lut, lutein;  $\beta$ -car,  $\beta$ -carotene; chl-a, chlorophyll a; chl-b, chlorophyll b. Asterisks represent the significance of individual components relative to WT, calculated with Student's *t* test; \**P* < 0.05, \*\* *P* < 0.01, and \*\*\**P* < 0.001. Data are means  $\pm$  SD (*n* = 3–4).

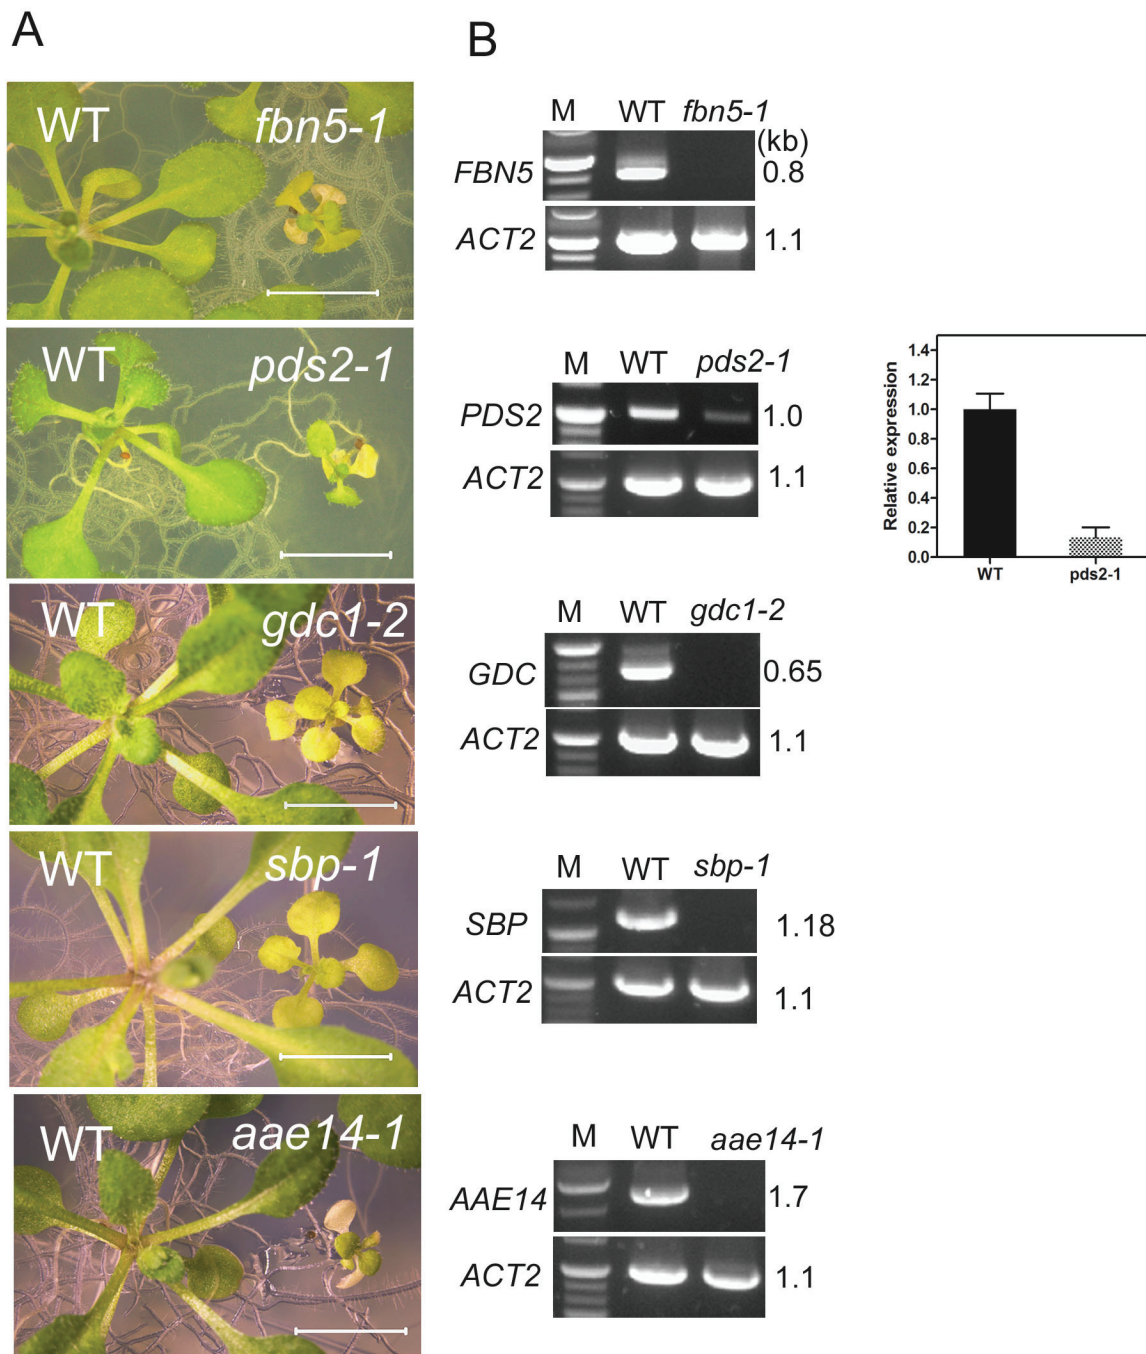

**Supplemental Figure 6.** Phenotypes of Pale-Green Mutants and WT Plants on 1%-Sucrose-Supplemented MS Medium. (A) Representative photographs of 3-week-old plants (A) and RT-PCR analysis of transcript levels in WT and pale-green mutants (B). All five pale-green mutants were null, except *pds2-1*, which showed a 90% reduction in *PDS2* expression compared with the WT. Numbers are transcript sizes. *fbn5-1*, allele SALK\_064597 of At5g09820; *pds2-1*, allele SALK\_024357 of At3g11945; *gdc1-2*, allele SALK\_151530C of At1g50900; *sbp-1*, allele SALK\_090549C of At3g55800; *aae14-1*, allele SALK\_060226 of At1g30520. *ACT2*, internal control. Bars = 0.5 cm.

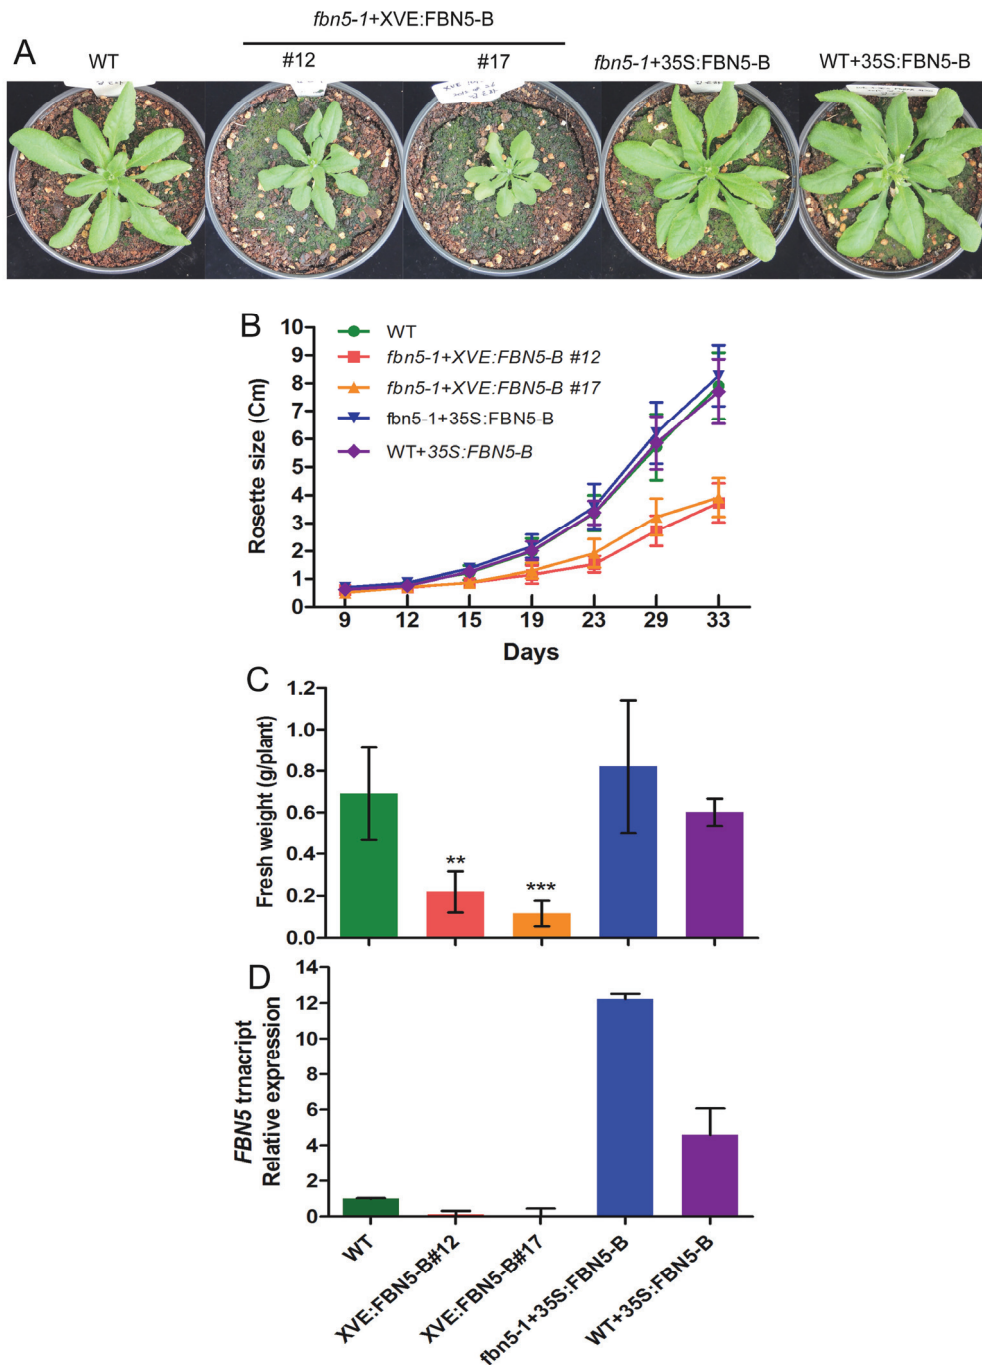

**Supplemental Figure 7.** Growth and Fresh Weight of *FBN5* Transgenic Plants. (A) Representative photographs of 5-week-old plants. (B) Growth rate was assessed by measuring the rosette sizes of the plants at each time point after seeds were sown ( $n = 8$ ). (C) Fresh weight of 33-day-old plants ( $n = 4$ ). Data are means  $\pm$  SD ( $n = 3-4$ ). Asterisks represent significance levels of each transgenic line relative to the WT plants, on Student's  $t$  test: \*\* $P < 0.01$  and \*\*\* $P < 0.001$  (D) Determination of *FBN5* gene expression in leaves with real-time RT-PCR. The expression levels in *FBN5* of *fbn5* knockdown, complemented, and overexpressed transgenic plants was normalized to that of *ACTIN2* and is shown relative to its expression in WT plants. Data are the means  $\pm$  SE of three independently prepared pools of plants.

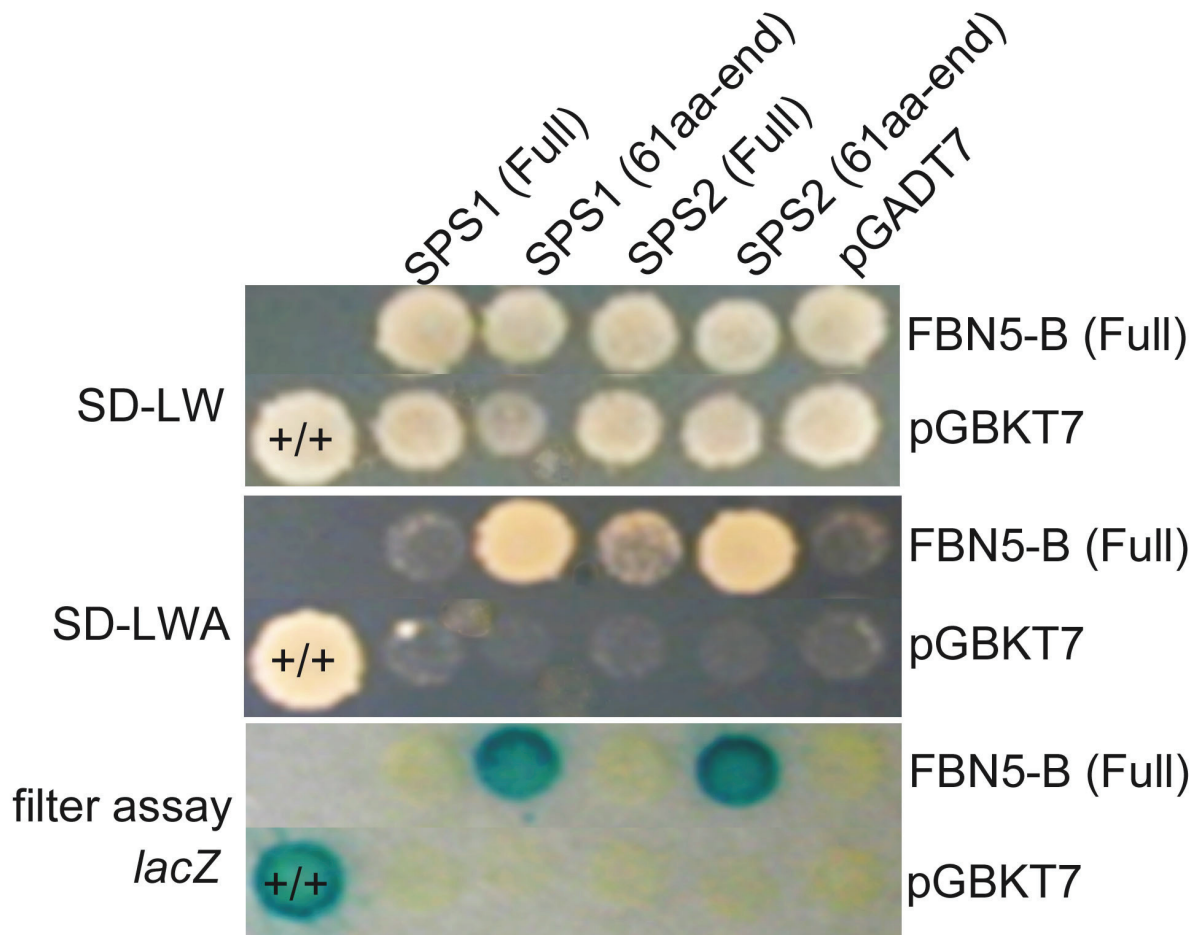

**Supplemental Figure 8.** Interaction of Preprotein and Mature SPSs with Full-length FBN5-B. A yeast two-hybrid analysis was performed using FBN5-B as the bait and either full-length (preprotein) or mature SPS1 or SPS2 as the prey. Each transformant (PBN204) was dropped onto selective medium lacking Leu and Trp (SD-LW) or selective medium also lacking Ade (SD-LWA).  $\beta$ -Galactosidase activity was tested in each colony on SD-LWA medium. The positive control was yeast transformed with the PTB bait plasmid and PTB prey plasmid (+/+). PTB is a homodimeric protein. The negative control was a cell transformed with the parental bait vector (pGBKT7) and prey vector (pGADT7).



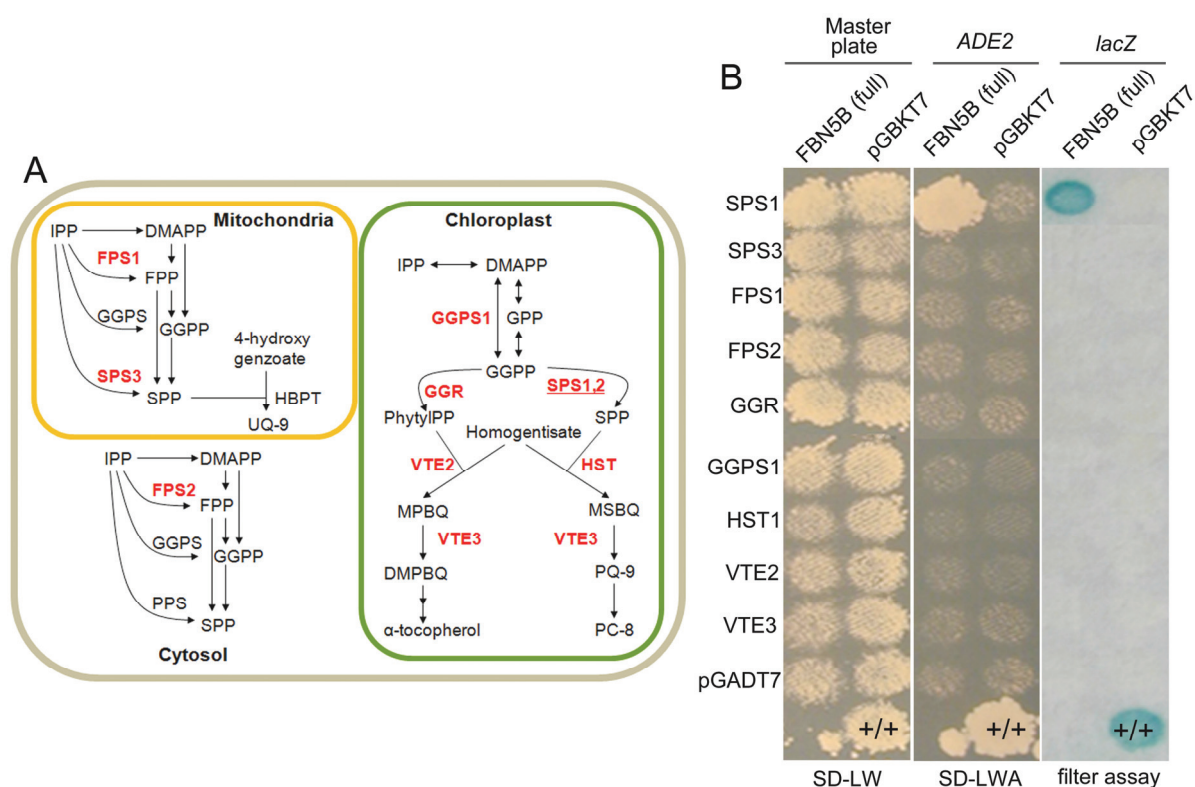

**Figure 9.** Enzymes Tested for Interaction with FBN5-B in a Yeast Two-hybrid Analysis (Y2H). (A) Generalized overview of the tocopherol and benzoprenylquinone biosynthetic pathways in *Arabidopsis*. Enzymes that are candidate interacting partners of FBN5-B, used for the Y2H experiments, are shown in red font. (B) Y2H experiments with full-length FBN5-B and candidate enzymes. Only SPS1 is in the mature form; the other enzymes are in the preprotein forms. The interactions between full-length FBN5-B and enzymes fused to the GAL4 DNA-activation domain were examined in each transformant by testing their growth on  $\text{Leu}^-$ ,  $\text{Trip}^-$ , and  $\text{Ade}^-$  SD-LWA medium.  $\beta$ -Galactosidase activity was tested in each colony on SD-LWA medium. Compartmentalization of *Arabidopsis* enzymes is based on the pathway constructed by Vranová et al., (2012) slightly modified based on recent findings. IPP, isopentenyl diphosphate (C5); DMAPP, dimethylallyl diphosphate (C5); GPP, geranyl diphosphate (C10); GGPS, geranylgeranyl diphosphate (GGPP, C20) synthase; FPS, farnesyl diphosphate (FPP, C15) synthase; SPS, solanesyl diphosphate (SPP, C45) synthase; PPS, polyprenyl diphosphate (PPP, C50) synthase; GGR, geranylgeranyl reductase; HST, homogentisate solanesyltransferase; VTE2, homogentisate phytyltransferase; VTE3, MPBQ/MSBQ methyltransferase; MPBQ, 2-methyl-6-phytyl-1,4-benzoquinone; MSBQ, 2-methyl-6-solanesyl-1,4-benzoquinone; PQ-9, plastoquinone-9; PC-8, plastochromanol-8; HBPT, 4-hydroxygenzoate polytransferase.

## REFERENCE

Vranová, E., Coman, D., and Gruissem, W. (2012). Structure and dynamics of the isoprenoid pathway network. *Mol. Plant* 5: 318-333.

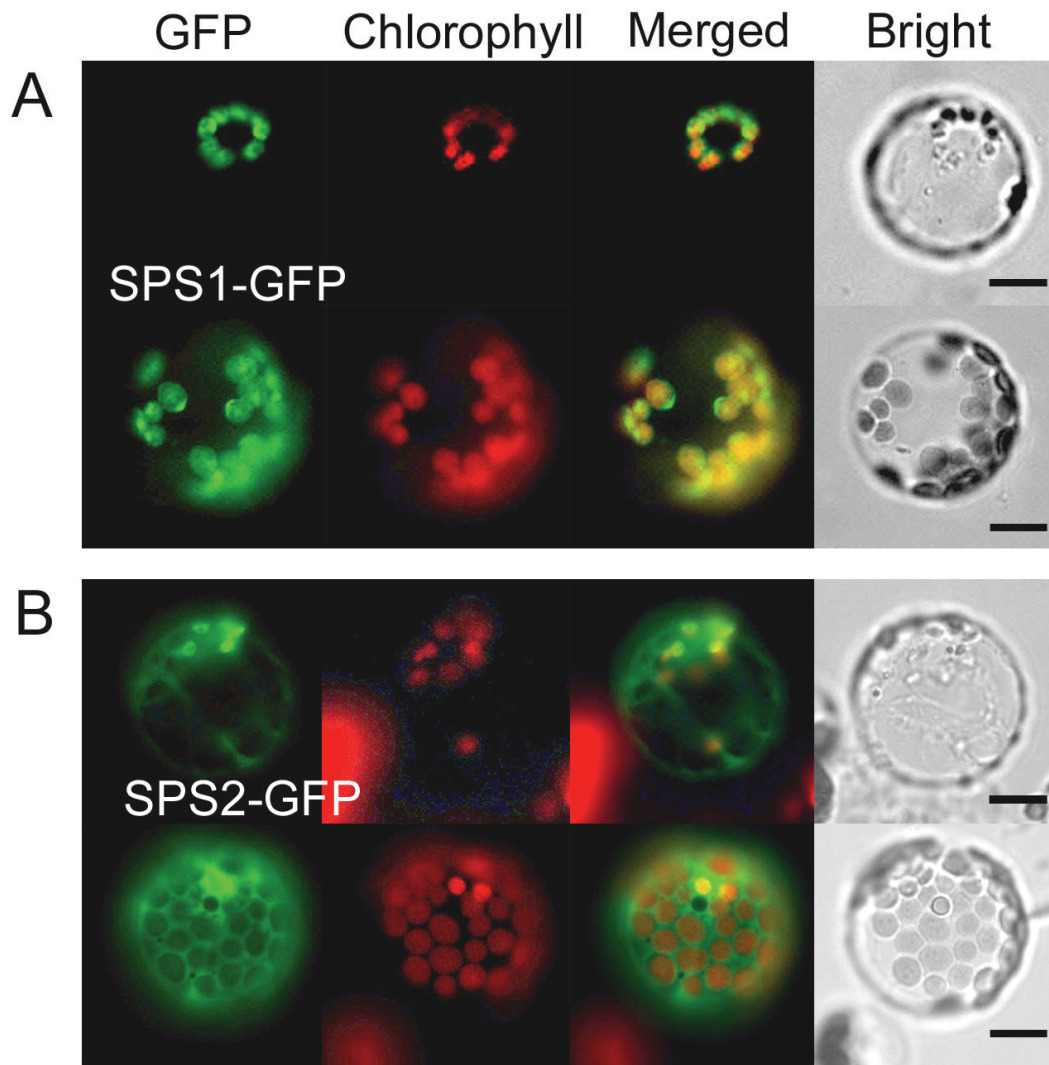

**Supplemental Figure 10.** Subcellular Localization of SPS1 (A) and SP2 (B). Representative confocal micrographs of the green fluorescence from sGFP (GFP), red fluorescence from chlorophyll, and merged signals are shown in the three left panels. Transmission micrographs (Bright) for *Arabidopsis* protoplasts expressing SPS1–sGFP (A) and SPS2–sGFP (B) are shown. Bars = 20  $\mu$ m.

## Supplemental Tables

**Supplemental Table 1.** Quantification of Tocochromanols and Prenylquinones in Leaves of Each Pale-Green Mutant

| Line           | Concentration, nmol/g (fresh weight) |               |               |           |          |           |            |
|----------------|--------------------------------------|---------------|---------------|-----------|----------|-----------|------------|
|                | $\delta$ -toc                        | $\gamma$ -toc | $\alpha$ -toc | PQ-9      | PC-8     | Total Toc | PQ-9+PC-8  |
| WT             | 1.0±0.1                              | 1.1±0         | 32.9±7.0      | 245.5±6.1 | 11.8±1.0 | 34.9±6.9  | 257.3±7.0  |
| <i>fbn5-1</i>  | 4.1±1.1                              | 9.7±2.5       | 30.5±3.8      | 8.5±0.5   | n.d.     | 44.3±5.0  | 8.5±0.5    |
| <i>pds2-1</i>  | 3.5±0.3                              | 18.6±2.0      | 20.4±1.2      | 17.4±0.9  | n.d.     | 42.5±3.3  | 17.4±1.5   |
| <i>gdc1-2</i>  | 1.8±0.2                              | 4.4±0.3       | 47.1±3.3      | 135.0±11  | 1.5±0.3  | 53.3±3.7  | 136.9±11.7 |
| <i>sbp-1</i>   | 1.1±0.3                              | 2.3±0.8       | 33.1±1.1      | 31.3±0.9  | 0.9±0.1  | 36.5±0.9  | 32.3±0.9   |
| <i>aae14-1</i> | 1.5±0.2                              | 20.7±9.1      | 13.2±4.7      | 39.5±12   | 0.8±0.1  | 35.4±13   | 40.3±12    |

*Arabidopsis* plants were grown on 0.5× MS medium with 1% sucrose for 18–21 days. For each measurement, the leaves of several plants, corresponding to approximately 15–20 mg, were combined. Pigments were analyzed with reversed-phase HPLC. Data are the mean values of three measurements ± SD. n.d., not detected

**Supplemental Table 2.** Quantification of Carotenoids and Chlorophylls in Leaves of Each Pale-Green Mutant

| Line           | Concentration, nmol/g (fresh weight) |              |                |        |                   |                      |                      |                   |                    |
|----------------|--------------------------------------|--------------|----------------|--------|-------------------|----------------------|----------------------|-------------------|--------------------|
|                | Neoxanthin                           | Violaxanthin | Antheraxanthin | Lutein | $\beta$ -carotene | Chlorophyll <i>b</i> | Chlorophyll <i>a</i> | Total Carotenoids | Total Chlorophylls |
| WT             | 80±5                                 | 75±0         | 5±1            | 281±6  | 106±6             | 739±37               | 1658±88              | 547±13            | 2397±125           |
| <i>fbn5-1</i>  | 51±1                                 | 66±5         | 14±3           | 195±5  | 54±6              | 544±30               | 1023±60              | 381±10            | 1567±120           |
| <i>pds2-1</i>  | 65±6                                 | 68±4         | 14±2           | 243±20 | 66±13             | 635±37               | 1193±166             | 455±42            | 1827±234           |
| <i>gdc1-2</i>  | 10±1                                 | 27±4         | 5±1            | 63±10  | 40±6              | 56±6                 | 284±25               | 144±22            | 340±31             |
| <i>sbp-1</i>   | 35±3                                 | 34±11        | 16±8           | 123±1  | 28±4              | 312±18               | 553±45               | 234±24            | 865±63             |
| <i>aae14-1</i> | 9±1                                  | 13±2         | 5±1            | 51±5   | 7±2               | 58±12                | 124±28               | 85±10             | 182±40             |

*Arabidopsis* plants were grown on 0.5× MS medium with 1% sucrose for 18–21 days. For each measurement, leaves of several plants, corresponding to approximately 15–20 mg, were combined. Pigments were analyzed with reversed-phase HPLC. Data are the means ± SD of three measurements



**Supplemental Table 3. Oligonucleotides Used in this Study**

| Primer name                                                                      | Use of primers                     | Primer                                  |
|----------------------------------------------------------------------------------|------------------------------------|-----------------------------------------|
| <b>Yeast two hybrid study</b>                                                    |                                    |                                         |
| FBN5-B-Y2HF                                                                      | Y2H bait, <i>EcoRI</i>             | GCGAATTCACGAGTAACCTTTTCCAGCC            |
| FBN5-B-Y2HR                                                                      | Y2H bait, <i>BamHI</i>             | GCGGATCCTTAAGGTTTCTCTATTCTTTCC          |
| FBN5-A-Y2HF                                                                      | FBN5A bait, <i>EcoRI</i>           | AGCGAATTCATGACGAGTAACCTTTTCCAG          |
| FBN5-A-Y2HR                                                                      | FBN5A bait, <i>BamHI</i>           | AGCGGATCCCTAGTTACGATTTTGGATTTAAT        |
| SPS1-Y2HF                                                                        | Preprotein SPS1 prey, <i>EcoRI</i> | AGCGAATTCATGATGACGTCATGTCCGAAT          |
| SPS1-Y2HR                                                                        | Preprotein SPS1 prey, <i>BamHI</i> | CGGGATCCCTAATCAATTCTTTCGAGGTTATA        |
| SPS2-Y2HF                                                                        | Preprotein SPS2 prey, <i>EcoRI</i> | AGCGAATTCATGATGACGTCATGTCCGAAT          |
| SPS2-Y2HR                                                                        | Preprotein SPS2 prey, <i>BamHI</i> | ACGGATCCCTCTGCCAATACCCTTTG              |
| SPS3-Y2HF                                                                        | Preprotein SPS3 prey, <i>EcoRI</i> | TCGAATTCATGTTATTCACGAGGAGTGTGCT         |
| SPS3-Y2HR                                                                        | Preprotein SPS3 prey, <i>BamHI</i> | ACGGATCCTCACTTGTCTGTTGATGACTC           |
| FPS1-Y2HF                                                                        | Preprotein FPS1 prey, <i>NdeI</i>  | GTCATATGATGAGTGTGAGTTGTTGTTGATAGG       |
| FPS1-Y2HR                                                                        | Preprotein FPS1 prey, <i>BamHI</i> | ACGGATCCCTACTTCTGCCTCTTGATAGATCTTAG     |
| FPS2-Y2HF                                                                        | Preprotein FPS2 prey, <i>NdeI</i>  | GTCATATGATGGCGGATCTGAAATCA              |
| FPS2-Y2HR                                                                        | Preprotein FPS2 prey, <i>BamHI</i> | ACGGATCCCTACTTCTGCCTCTTGATAGATCTTA      |
| VTE2-Y2HF                                                                        | Preprotein VTE2 prey, <i>EcoRI</i> | TCGAATTCATGGAGTCTCTGCTCTCTAGTTCTT       |
| VTE2-Y2HR                                                                        | Preprotein VTE2 prey, <i>BamHI</i> | ACGGATCCCAAAAATCCATACGTTCTGCAA          |
| VTE3-Y2HF                                                                        | Preprotein VTE3 prey, <i>EcoRI</i> | TCGAATTCAACTTGGTGGATCTGTCATCG           |
| VTE3-Y2HR                                                                        | Preprotein VTE3 prey, <i>BamHI</i> | ACGGATCCTCAGATGGGTTGGTCTTTGG            |
| HST-Y2HF                                                                         | Preprotein HST prey, <i>NdeI</i>   | GTCATATGATGGAGCTCTCGATCTCACA            |
| HST-Y2HR                                                                         | Preprotein HST prey, <i>EcoRI</i>  | TCGAATTCCTAGAGGAAGGGGAATAACAGA          |
| GGR-Y2HF                                                                         | Preprotein GGR prey, <i>NdeI</i>   | GTCATATGATGGCGACGACGGTTACA              |
| GGR-Y2HR                                                                         | Preprotein GGR prey, <i>BamHI</i>  | ACGGATCCTTAAACACTAAGCTTCTCAATCTCTCT     |
| PTB-Y2HF                                                                         | Positive control, <i>EcoRI</i>     | TCGAATTCATGGACGGCATCGTCCAG              |
| PTB-Y2HR                                                                         | Positive control, <i>BamHI</i>     | ACGGATCCCTAGATGGTGGACTTGGAG             |
| SPS1-Y2HMF                                                                       | Mature SPS1 prey, <i>NdeI</i>      | GCCCATATGGCTGTTCCGGCTAAATCCAA           |
| SPS2-Y2HMF                                                                       | Mature SPS2 prey, <i>NdeI</i>      | GCCCATATGGCTGTTCCGGCTAAATCCAA           |
| SPS3-Y2HMF                                                                       | Mature SPS3 prey, <i>EcoRI</i>     | GC GAA TTC GCA ATC ATT CCC GAT CAG GG   |
| HST-Y2HMF                                                                        | Mature HST prey, <i>NdeI</i>       | GGCCAT ATG GCA TGT TCT CAG GTT GGT GC   |
| VTE2-Y2HMF                                                                       | Mature VTE2 prey, <i>EcoRI</i>     | GCGAA TTC TGT GAT TCG AGT AAA GTT GTC G |
| <b>Yeast two hybrid analysis for FBN5-B domain interacting with SPS1 or SPS2</b> |                                    |                                         |
| 1-61aa-F                                                                         | Forward, <i>EcoRI</i>              | AGCGAATTCATGACGAGTAACCTTTTCCAG          |
| 1-61aa-R                                                                         | Reverse, <i>BamHI</i>              | AGCGGATCCTTAAGAACTCTGTTCTGTGAC          |
| 1-130aa-F                                                                        | Forward, <i>EcoRI</i>              | AGCGAATTCATGACGAGTAACCTTTTCCAG          |
| 1-130aa-R                                                                        | Reverse, <i>BamHI</i>              | AGCGGATCCTTATCCAGTCGGCTCCGG             |
| 31-273aa-F                                                                       | Forward, <i>EcoRI</i>              | AGCGAATTCCTTACCAGTTCTAATGGCAAAA         |
| 31-273aa-R                                                                       | Reverse, <i>BamHI</i>              | AGCGGATCCTTAAGGTTTCTCTATTCTTTCC         |
| 41-273aa-F                                                                       | Forward, <i>EcoRI</i>              | AGCGAATTCCTTAGTGACAACTCATTTAGGC         |
| 41-273aa-R                                                                       | Reverse, <i>BamHI</i>              | AGCGGATCCTTAAGGTTTCTCTATTCTTTCC         |
| 51-273aa-F                                                                       | Forward, <i>EcoRI</i>              | AGCGAATTCATGTTTCATCGGGAAAGTCACAG        |
| 51-273aa-R                                                                       | Reverse, <i>BamHI</i>              | AGCGGATCCTTAAGGTTTCTCTATTCTTTCC         |
| 62-273aa-F                                                                       | Forward, <i>EcoRI</i>              | AGCAATTCCTGTTCTCCCAATGAACA              |
| 62-273aa-R                                                                       | Reverse, <i>BamHI</i>              | AGCGGATCCTTAAGGTTTCTCTATTCTTTCC         |
| 62-130aa-F                                                                       | Forward, <i>EcoRI</i>              | GACGAATTCCTGTTCTCCCAATGAACAA            |
| 62-130aa-R                                                                       | Reverse, <i>BamHI</i>              | ACGGGATCCTTATCCAGTCGGCTCCGG             |
| 131-273aa-F                                                                      | Forward, <i>EcoRI</i>              | AGCGAATTCGAGTTAGACAAGATCGGAGG           |
| 131-273aa-R                                                                      | Reverse, <i>BamHI</i>              | AGCGGATCCTTAAGGTTTCTCTATTCTTTCC         |
| <b>Subcellular localization</b>                                                  |                                    |                                         |

|                               |                |                                      |
|-------------------------------|----------------|--------------------------------------|
| FBN5A-sGFP-F                  | <i>Bam</i> HI  | AGCGGATCCATGACGAGTAACCTTTTCCAG       |
| FBN5A-sGFP-R                  | <i>Bam</i> HI  | AGCGGATCCCTAGTTACGATTTTGGATTTTAAT    |
| FBN5B-sGFP-F                  | <i>Bam</i> HI  | AGCGGATCCATGACGAGTAACCTTTTCCAG       |
| FBN5B-sGFP-R                  | <i>Bam</i> HI  | AGCGGATCCAGGTTTCTCTATTCTTTCCAAA      |
| SPS1-sGFP-F                   | <i>Bam</i> HI  | ACGGATCCATGATGACGTCATGTCGGAAT        |
| SPS1-sGFP-R                   | <i>Bam</i> HI  | ACGGATCCATCAATTCTTTTCGAGGTTATACAACA  |
| SPS2-sGFP-F                   | <i>Bam</i> HI  | AGCGGATCCATGATGATGTCATGTCGGAATA      |
| SPS2-sGFP-R                   | <i>Bam</i> HI  | ACGGATCCATCAATCCTTTCAAGATTAACATTA    |
| <b>Co-immunoprecipitation</b> |                |                                      |
| SPS1-HA tag-F                 | <i>Xba</i> I   | ACGTCTAGAATGATGACGTCATGTCGGAAT       |
| SPS1-HA tag-R                 | <i>Bam</i> HI  | AGCGGATCCATCAATTCTTTTCGAGGTTATACAACA |
| SPS2-HA tag-F                 | <i>Xba</i> I   | ACGTCTAGAATGATGATGTCATGTCGGAATA      |
| SPS2-HA tag-R                 | <i>Bam</i> HI  | AGCGGATCCATCAATCCTTTCAAGATTAACATTA   |
| <b>BiFC analysis</b>          |                |                                      |
| FBN5-A-BiFC-F                 | pENTR/D-TOPO   | CACCATGACGAGTAACCTTTTCCAG            |
| FBN5-B-BiFC-F                 | pENTR/D-TOPO   | CACCATGACGAGTAACCTTTTCCAG            |
| FBN5-B-BiFC-R                 | pENTR/D-TOPO   | AGGTTTCTCTATTCTTTCCAAA               |
| SPS1-BiFC-F                   | pENTR/D-TOPO   | CACCATGATGACGTCATGTCGGAAT            |
| SPS1-BiFC-R                   | pENTR/D-TOPO   | ATCAATTCTTTTCGAGGTTATACAACA          |
| SPS2-BiFC-F                   | pENTR/D-TOPO   | CACCATGATGATGTCATGTCGGAATA           |
| SPS2-BiFC-R                   | pENTR/D-TOPO   | ATCAATCCTTTCAAGATTAACAT              |
| <b>RT-PCR</b>                 |                |                                      |
| P1                            | <i>FBN5-B</i>  | ATGACGAGTAACCTTTTCCAG                |
| P2                            | <i>FBN5-B</i>  | TTAAGGTTTCTCTATTCTTTCC               |
| P3                            | <i>FBN5-A</i>  | CTAGTTACGATTTTGGATTTTAAT             |
| Actin2-F                      | <i>ACTIN2</i>  | GGTGTGTCATGGTTGGGATGAA               |
| Actin2-R                      | <i>ACTIN2</i>  | GATTCCTGGACCTGCCTGAT                 |
| Actin7-F                      | <i>ACTIN7</i>  | TCCATTTCTCTATCTTTCTCTCTCGCTG         |
| Actin7-R                      | <i>ACTIN7</i>  | CAAACCTACCACCACGAACCAGATAA           |
| PDS2-1-RT-F                   | <i>PDS2</i>    | CTCGATCTCACAATCACCGC                 |
| PDS2-1-RT-R                   | <i>PDS2</i>    | AGCCTGAAGCCAAGATCACA                 |
| AAE14-RT-F                    | <i>AAE14</i>   | GGCTAATCACTCTCGGCCTC                 |
| AAE14-RT-R                    | <i>AAE14</i>   | AGAGAGAGCTAGTCATGATTTGGAA            |
| GDC1-RT-F                     | <i>GDC1</i>    | ATGGCTTCTTCTTCAATCTCA                |
| GDC1-RT-R                     | <i>GDC1</i>    | CGCCAAACACCATAGAACA                  |
| SBP-RT-F                      | <i>SBP</i>     | ATGGAGACCAGCATCGC                    |
| SBP-RT-R                      | <i>SBP</i>     | CTAAGCGGTAACCTCCAATG                 |
| <b>Genotyping</b>             |                |                                      |
| SALK_064597-LP                | <i>fbn5-1</i>  | GAGACGAAATCTCGAAGACCC                |
| SALK_064597-RP                | <i>fbn5-1</i>  | AGAGGCATCGTATGGTGAATG                |
| SALK_024357-LP                | <i>pds2-1</i>  | TTATGAGCTGCCAGTTTCAG                 |
| SALK_024357-RP                | <i>pds2-1</i>  | AGAGAACCAGAAACCAAAGCTC               |
| SALK_024357-LP                | <i>aae14-1</i> | TCGTACAGTCTACGGAAACC                 |
| SALK_024357-RP                | <i>aae14-1</i> | TGTGCAAATACACCTGCAGAG                |
| SALK_151530C-LP               | <i>gdc1-2</i>  | ATGCAGACGAAAACGGATATG                |
| SALK_151530C-RP               | <i>gdc1-2</i>  | CTCATTCTCCTGTGCACCTTC                |
| SALK_090549C-LP               | <i>sbp-1</i>   | GGAATCTTATGACATTCCAAAATG             |
| SALK_090549C-RP               | <i>sbp-1</i>   | TCAATCCCTTGTGAGGAGTTG                |
| T-DNA-1                       | LBb1.3         | ATTTTGCCGATTTTCGGAAC                 |
| T-DNA-2                       | Lba1           | TGG TTC ACG TAG TGG GCC ATC G        |
| <b>Real-time PCR</b>          |                |                                      |
| FBN5B-F                       | <i>FBN5-B</i>  | TAGGCTCAGACCCATGTTCA                 |
| FBN5B-R                       | <i>FBN5-B</i>  | CTAACTCTCCAGTCGGCTCC                 |
| PDS2-F                        | <i>PDS2</i>    | CCCAGTTGCAGCATTTCTTA                 |
| PDS2-R                        | <i>PDS2</i>    | CAGGTGCACTCCACTGAAAT                 |
| SPS1-F                        | <i>SPS1</i>    | CACTGCAAGCTTGATACACG                 |
| SPS1-R                        | <i>SPS1</i>    | GAAGTGTTCCTTTCTGCAA                  |
| SPS2-F                        | <i>SPS2</i>    | TCTTGTTTGGTTTCAAGCGA                 |
| SPS2-R                        | <i>SPS2</i>    | CGGGTTCAAGACACATCATC                 |
| Actin-2-QR-F                  | <i>ACTIN2</i>  | AGCACATTCCAGCAGGTAAA                 |
| Actin-2-QR-R                  | <i>ACTIN2</i>  | TCTGTGAACGATTCTGGAC                  |

---

| <b>GUS expression</b> |                      |                              |
|-----------------------|----------------------|------------------------------|
| P4                    | <i>FBN5</i> promoter | CACCAACGTCACCGAAGGCTGTGATTGT |
| P5                    | <i>FBN5</i> promoter | TAGCAGTTTATACACCAGAATCTCTAA  |

---
